# Supplementary material for: Reconstruction of Avian Reovirus History and Dispersal Patterns: A Phylodynamic Study
Source: MDPI journal article supplement (doi:10.3390/v16050796), 2024-05-16
Supplement: s1 [file s1]

**Table S1.** Summary of the metadata of sequences included in the study. For each genotype, the macroarea, country, and collection period are reported. Time to most recent common ancestor and evolutionary rate are also reported.

| Genotype   | Region (number of sequences) | Countries                                                        | Date range | tMRCA [95HPD]             | substitution rate (s/s/y) [95HPD]                                         |
|------------|------------------------------|------------------------------------------------------------------|------------|---------------------------|---------------------------------------------------------------------------|
| Genotype 1 | Africa (4)                   | Egypt                                                            | 1984–2023  | 112.55<br>[79.65–148.35]  | 2.31×10 <sup>-3</sup><br>[1.82×10 <sup>-3</sup> –2.83×10 <sup>-3</sup> ]  |
|            | Asia (69)                    | Bangladesh, China, India, Indonesia, Malaysia, Vietnam           |            |                           |                                                                           |
|            | Central America (4)          | Costa Rica, Mexico                                               |            |                           |                                                                           |
|            | Europe (12)                  | Germany, Hungary, Poland, Romania, Russia                        |            |                           |                                                                           |
|            | Middle East (25)             | Iran, Israel, Oman                                               |            |                           |                                                                           |
|            | North America (176)          | Canada, USA                                                      |            |                           |                                                                           |
|            | South America (9)            | Brazile, Chile                                                   |            |                           |                                                                           |
| Genotype 2 | Africa (4)                   | Egypt, Ghana, Morocco                                            | 2005–2023  | 237.47<br>[177.61–300.45] | 1.80×10 <sup>-3</sup><br>[1.418×10 <sup>-3</sup> –2.21×10 <sup>-3</sup> ] |
|            | Asia (31)                    | Bangladesh, China, Indonesia, Malaysia, Philippines, South Korea |            |                           |                                                                           |
|            | Central America (4)          | Costa Rica, Nicaragua, Panama                                    |            |                           |                                                                           |
|            | Europe (24)                  | Bulgaria, Hungary, Poland, Romania, Russia, Spain                |            |                           |                                                                           |
|            | Middle East (30)             | Iran, Israel, Turkey, United Arab Emirates                       |            |                           |                                                                           |
|            | North America (191)          | Canada, USA                                                      |            |                           |                                                                           |
|            | South America (12)           | Argentina, Brazil, Chile, Colombia                               |            |                           |                                                                           |
| Genotype 3 | Africa (2)                   | Egypt                                                            | 2007–2021  | 381.56<br>[290.61–469.99] | 1.22×10 <sup>-3</sup><br>[8.88×10 <sup>-4</sup> –1.56×10 <sup>-3</sup> ]  |
|            | Asia (8)                     | China, Malaysia                                                  |            |                           |                                                                           |
|            | Europe (5)                   | Hungary, Romania, Russia                                         |            |                           |                                                                           |
|            | Middle East (4)              | Iran, Israel                                                     |            |                           |                                                                           |
|            | North America (53)           | Canada, USA                                                      |            |                           |                                                                           |
|            | South America (4)            | Bolivia, Chile, Colombia, Jamaica                                |            |                           |                                                                           |
| Genotype 4 | Africa (7)                   | Egypt, Morocco, South Africa                                     | 1984–2023  | 226.83<br>[150.01–307.91] | 2.03×10 <sup>-3</sup><br>[1.51×10 <sup>-3</sup> –2.55×10 <sup>-3</sup> ]  |
|            | Asia (9)                     | China, Japan, Malaysia, Philippines                              |            |                           |                                                                           |
|            | Central America (1)          | Nicaragua                                                        |            |                           |                                                                           |

|               |                     |                                                                        |           |                |                                                 |
|---------------|---------------------|------------------------------------------------------------------------|-----------|----------------|-------------------------------------------------|
|               | Europe (26)         | France, Germany, Greece, Hungary, Netherlands, Poland, Romania, Russia |           |                |                                                 |
|               | Middle East (5)     | Israel, Lebanon, Oman, United Arab Emirates                            |           |                |                                                 |
|               | North America (92)  | Canada, USA                                                            |           |                |                                                 |
|               | South America (4)   | Argentina, Brazil, Colombia                                            |           |                |                                                 |
| Genotype<br>5 | Africa (25)         | Cote d'Ivoire, Egypt                                                   |           |                |                                                 |
|               | Asia (21)           | China, Japan                                                           |           |                |                                                 |
|               | Central America (5) | Costa Rica, Nicaragua                                                  |           |                |                                                 |
|               | Europe (6)          | Germany, Switzerland, Ukraine                                          | 1984–2022 | 101.55         | 2.45 <sup>-3</sup>                              |
|               | Middle East (132)   | Israel, Saudi Arabia                                                   |           | [60.70–147.82] | [1.74×10 <sup>-3</sup> –3.27×10 <sup>-3</sup> ] |
|               | North America (231) | Canada, USA                                                            |           |                |                                                 |
|               | South America (9)   | Brazil, Chile, Colombia                                                |           |                |                                                 |
| Genotype<br>6 | Africa (1)          | Egypt                                                                  |           |                |                                                 |
|               | Asia (11)           | China, Japan, Malaysia, Philippines                                    |           |                |                                                 |
|               | Central America (3) | Mexico, Panama                                                         |           | 284.27         | 1.33×10 <sup>-3</sup>                           |
|               | Europe (14)         | Bulgaria, Greece, Hungary, Romania, Russia, Spain, Ukraine             | 2004–2022 | [167.55–       | [9.24×10 <sup>-4</sup> –1.77×10 <sup>-3</sup> ] |
|               | Middle East (8)     | Iran, Israel, Saudi Arabia, Turkey                                     |           | 430.47]        |                                                 |
|               | North America (67)  | Canada, USA                                                            |           |                |                                                 |
|               | South America (21)  | Brazil, Chile, Colombia                                                |           |                |                                                 |
| Genotype<br>7 | Africa (1)          | Cameroon                                                               |           | Not            |                                                 |
|               | Asia (1)            | Viet Nam                                                               | 2013–2019 | calculated     | Not calculated                                  |
|               | North America (14)  | Canada, USA                                                            |           |                |                                                 |

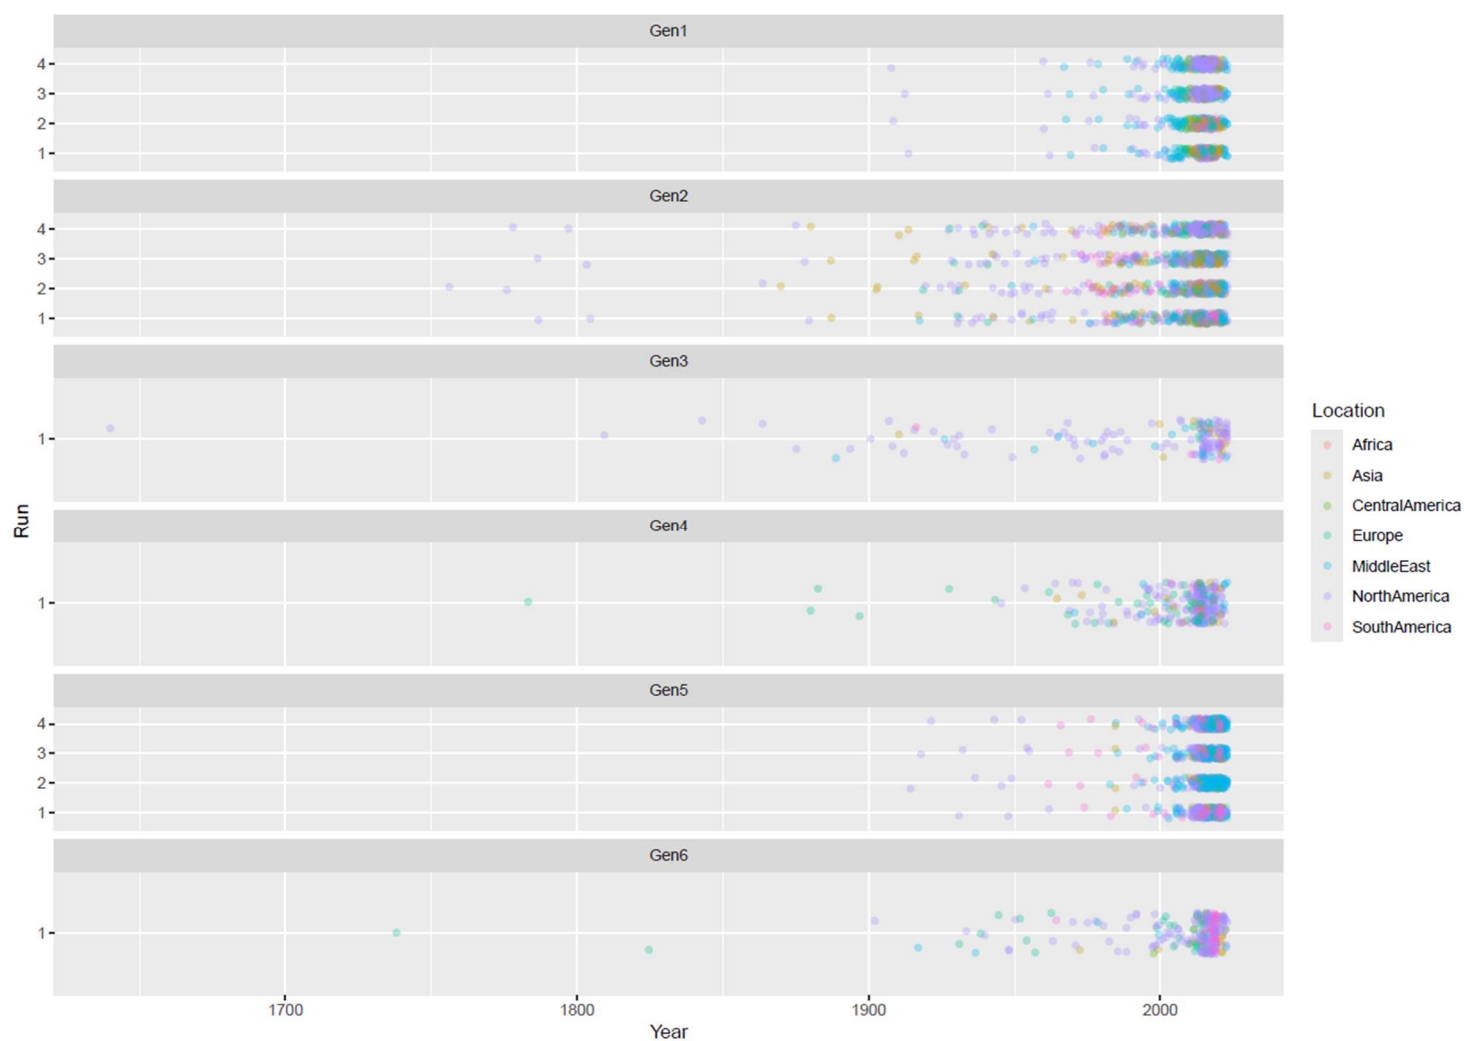

**Figure S1.** Estimated geographical distribution of different genotypes and ARVs over time. Different macro-areas have been color-coded. When multiple runs were performed, they were depicted as different rows.

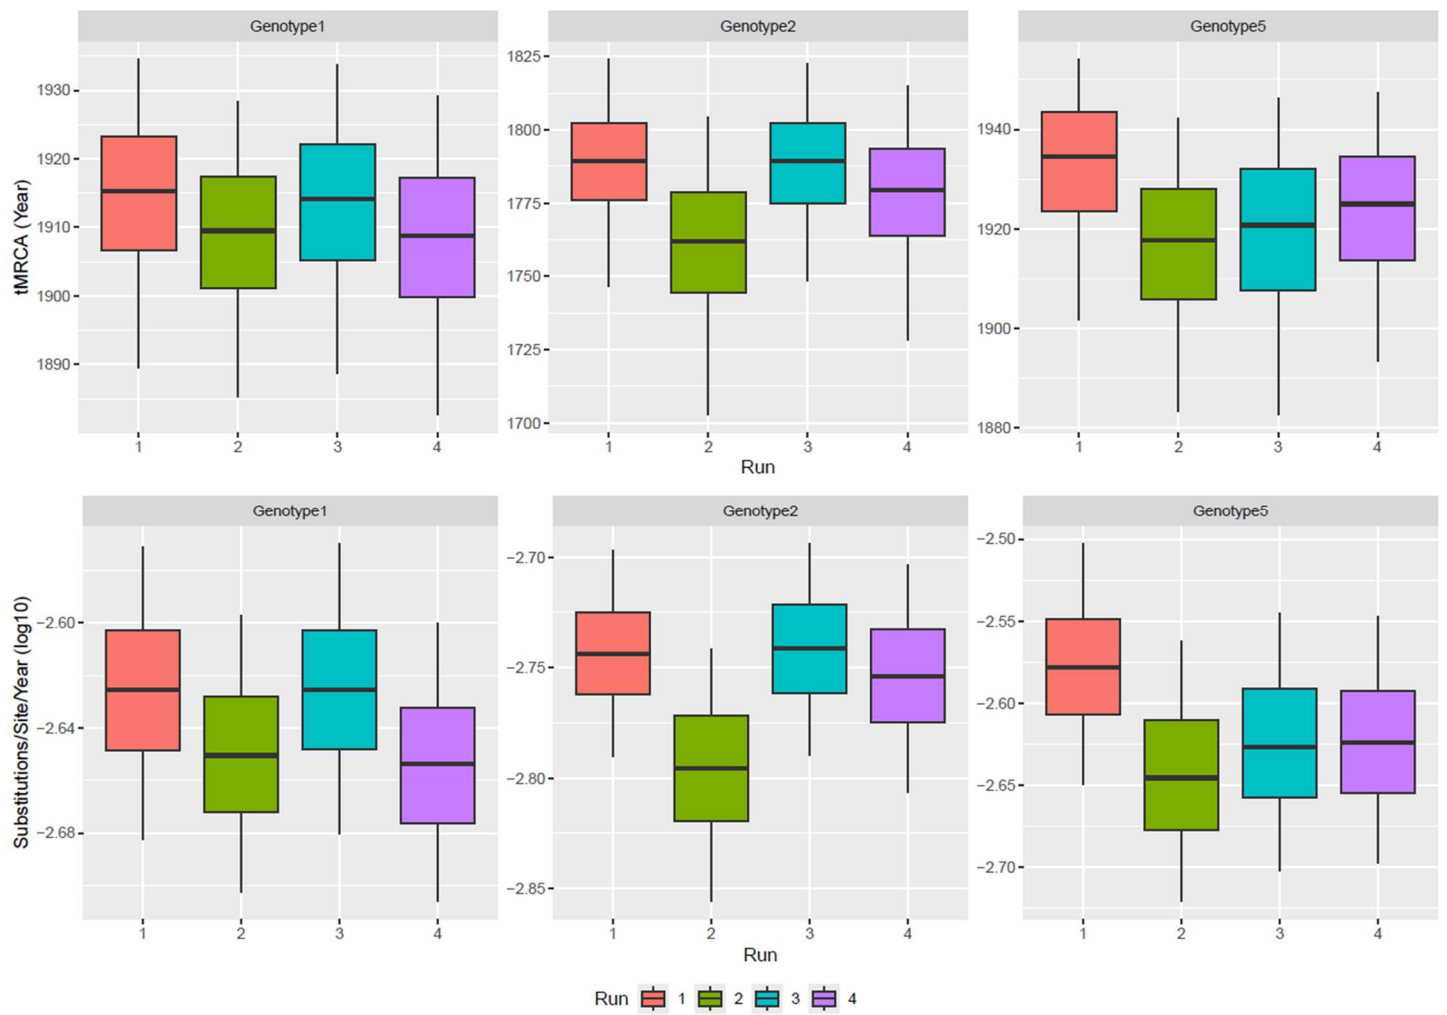

**Figure S2.** Boxplot depicting the tMRCA posterior probability (upper panel) and mean evolutionary rate (expressed in base-10 logarithm) (lower panel). Graphs are depicted for the genotype for which multiple runs were performed.

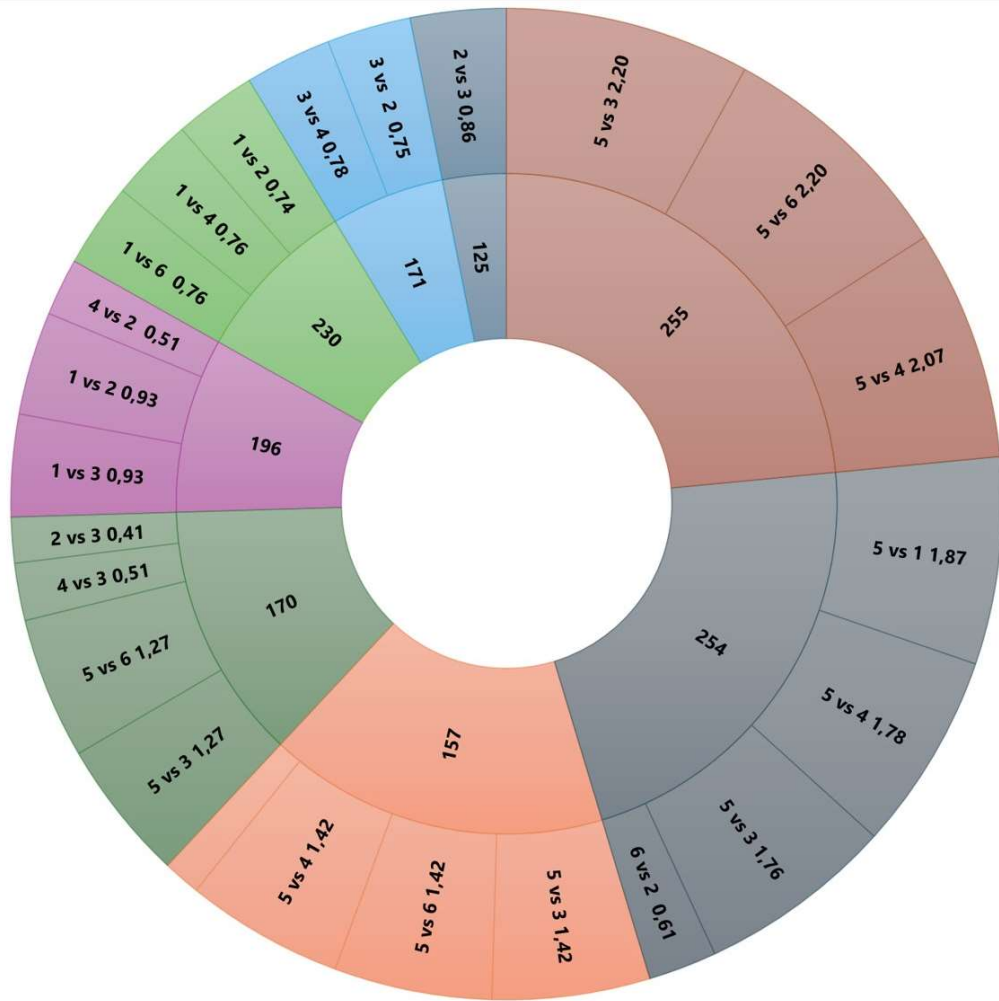

**Figure S3.** Graphical summary of the amino acid positions where a differential diversifying selection was detected among genotypes. The inner circle reports the involved position, while, in the outer one, the involved genotype pairs are reported. The size of the slices is proportional to the dN/dS difference (reported within the slice) for each genotype pair.
